# Supplementary material
Source: Research Square preprint supplement (doi:10.21203/rs.3.rs-8303339/v1)
Supplement: Supplementary file 1 [file fde01c3496b78b1f6003f06f.docx]

**Questionnaire**

**Part I: Personal information:**

1. Gender: Male Female
2. Years of service: Years

|  |
| --- |
|  |
|  |
|  |
|  |

1. You are working as a; Consultant

Postgraduate trainee

Grade Dental Surgeon

Dental Surgeon

General Practitioner

|  |
| --- |
|  |
|  |
|  |

1. You are working at Government Hospital

Dental Faculty

Privet Hospital/ Own privet clinic

Part time privet

5. Have you done initial management of an avulsed tooth during last 6 months (Before Corona pandemic)

Yes No

1. Have you managed avulsed teeth as follow up visits last year and how many cases?

How many cases

1. Did you have any current updates on ‘Management of Avulsed Teeth’ after your undergraduate/postgraduate academic training?

Yes No

1. If “Yes”, how did you update your knowledge on avulsed teeth management? Through;

|  |
| --- |
|  |
|  |
|  |
|  |
|  |

Usual Internet

Workshops/Scientific Sessions

International Guide Lines

Visual Trauma Guide

Colleague

Other

1. If “No” what are the barriers you have identified to prevent your update on avulsed teeth management?

|  |
| --- |
|  |
|  |
|  |
|  |
|  |
|  |

No self-motivation

Lack of interest

Lack of opportunities/time

There is no requement

Lack of trauma patients to handle

Refer the Patients to other centers

Other

**Part II: Knowledge:**

Please answer all the questions according to your current knowledge regarding avulsed tooth.

10. What do you think is the most appropriate action for an avulsed permanent tooth?

Stop the bleeding and search for the tooth

Search for the tooth and seek help

Search for the tooth and put it back into the socket of the injured tooth

No need to search for the tooth as it is already knocked-out

11. How urgent do you think it is to seek professional help?

Immediately

Within 30 min

Within a few hours

Before 24 h has elapsed

No need to seek professional help

1. Which is the correct descending order of preference of storage medium?

(HBSS = Hanks' Balanced Salt Solution)

HBSS > Milk > Saline > Saliva

Saline > Saliva > Milk > HBSS

Milk > HBSS > Saliva > Saline

Saliva > Saline > HBSS > Milk

1. Would you replant if a primary tooth has been knocked-out were a primary tooth?

Yes No

**Part III: Management:**

Please answer all the questions according to your current knowledge regarding avulsed tooth.

1. What is the immediate management of an avulsed tooth found in a dirty place?

Wipe the tooth with a tissue paper

Rinse the tooth gently under running water for a few seconds without scrubbing

No need to clean the tooth because it is useless

Rinse it gently with either milk, saline or the patient's own saliva

1. What is the most appropriate way to hold the avulsed tooth

From the crown

From the root

Anywhere (crown or root)

1. If the avulsed tooth/teeth were replanted in the wrong socket or malposition, consider repositioning the tooth/teeth into the proper location up to ,

60 minutes

12 Hours

24 Hours

1. ours

17. The recommended stabilization/splinting time after avulsion is

1 Week

2 Weeks

4 Weeks

1. Month
2. The recommended timing for initiation of the endodontic treatment for avulsed tooth is

Before splinting

Within 2 Weeks

After 2 Weeks

Immediately after splinting

19. Prognosis of the replanted avulsed tooth is depending on

SA- Strongly Agree A-Agree N- Neutral D-Disagree SD-Strongly Disagree

| Statement | SA | A | N | D | SD |
| --- | --- | --- | --- | --- | --- |
| Extra oral dry time |  |  |  |  |  |
| Storage medium |  |  |  |  |  |
| Development stage of the root formation (open / closed apex) |  |  |  |  |  |
| Splinting time |  |  |  |  |  |

1. Regarding the post-splinting patient instructions

SA- Strongly Agree A-Agree N- Neutral D-Disagree SD-Strongly Disagree

| Statement | SA | A | N | D | SD |
| --- | --- | --- | --- | --- | --- |
| Avoid participation in contact sports |  |  |  |  |  |
| Maintain a soft diet for up to 2 weeks |  |  |  |  |  |
| Brush their teeth with a soft toothbrush after each meal |  |  |  |  |  |

21. Regarding the importance of clinical and radiographic follow-ups

SA- Strongly Agree A-Agree N- Neutral D-Disagree SD-Strongly Disagree

| Statement | SA | A | N | D | SD |
| --- | --- | --- | --- | --- | --- |
| To assess the spontaneous pulp space revascularization in open apexed teeth |  |  |  |  |  |
| To identify the evidence of root and/or bone resorption |  |  |  |  |  |
| To interpret the ankylosis-related (replacement) resorption |  |  |  |  |  |
| To observe root canal obliteration |  |  |  |  |  |
